# Supplementary material
Source: PubMed Central journal article supplement (PMC452566)

**Fig. S1. Matuliene and Kuriyama**

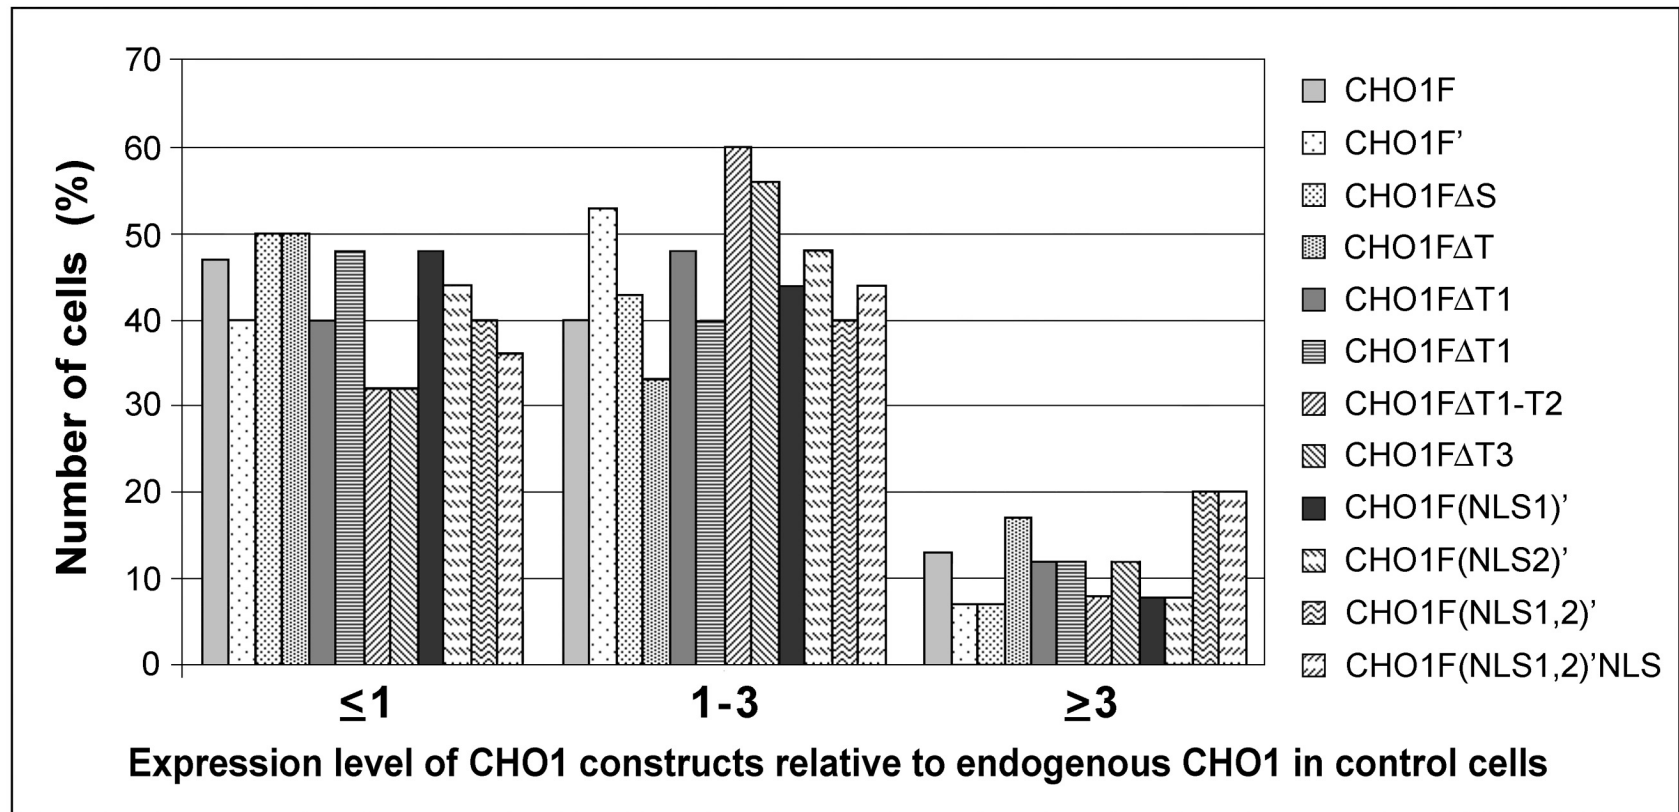

Supplement: mbc_15_7_3083__1.pdf [file mbc_15_7_3083__1.pdf]

**Fig. S2. Matuliene and Kuriyama**

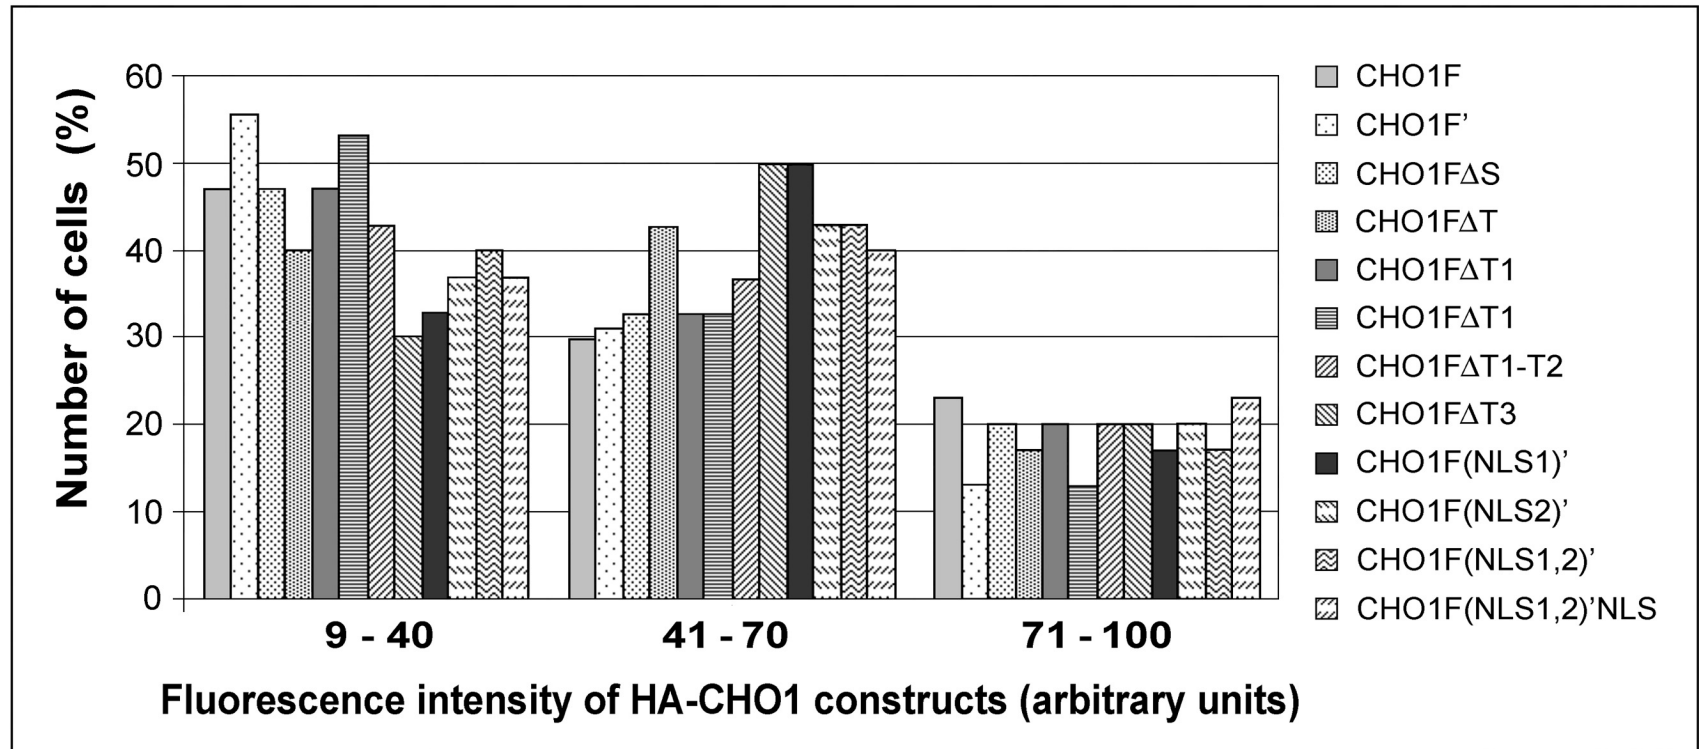

Supplement: mbc_15_7_3083__2.pdf [file mbc_15_7_3083__2.pdf]
